# Supplementary material for: Biological Stoichiometry Regulates Toxin Production in Microcystis aeruginosa (UTEX 2385)
Source: MDPI journal article supplement (doi:10.3390/toxins11100601), 2019-10-16
Supplement: s1 [file s1]

# Supplementary Materials: Biological stoichiometry regulates toxin production in *Microcystis aeruginosa* (UTEX 2385)

Nicole D. Wagner, Felicia S. Osburn, Jingyu Wang, Raegyn B. Taylor, Ashlynn R. Boedecker, C. Kevin Chambliss, Bryan W. Brooks and J. Thad Scott

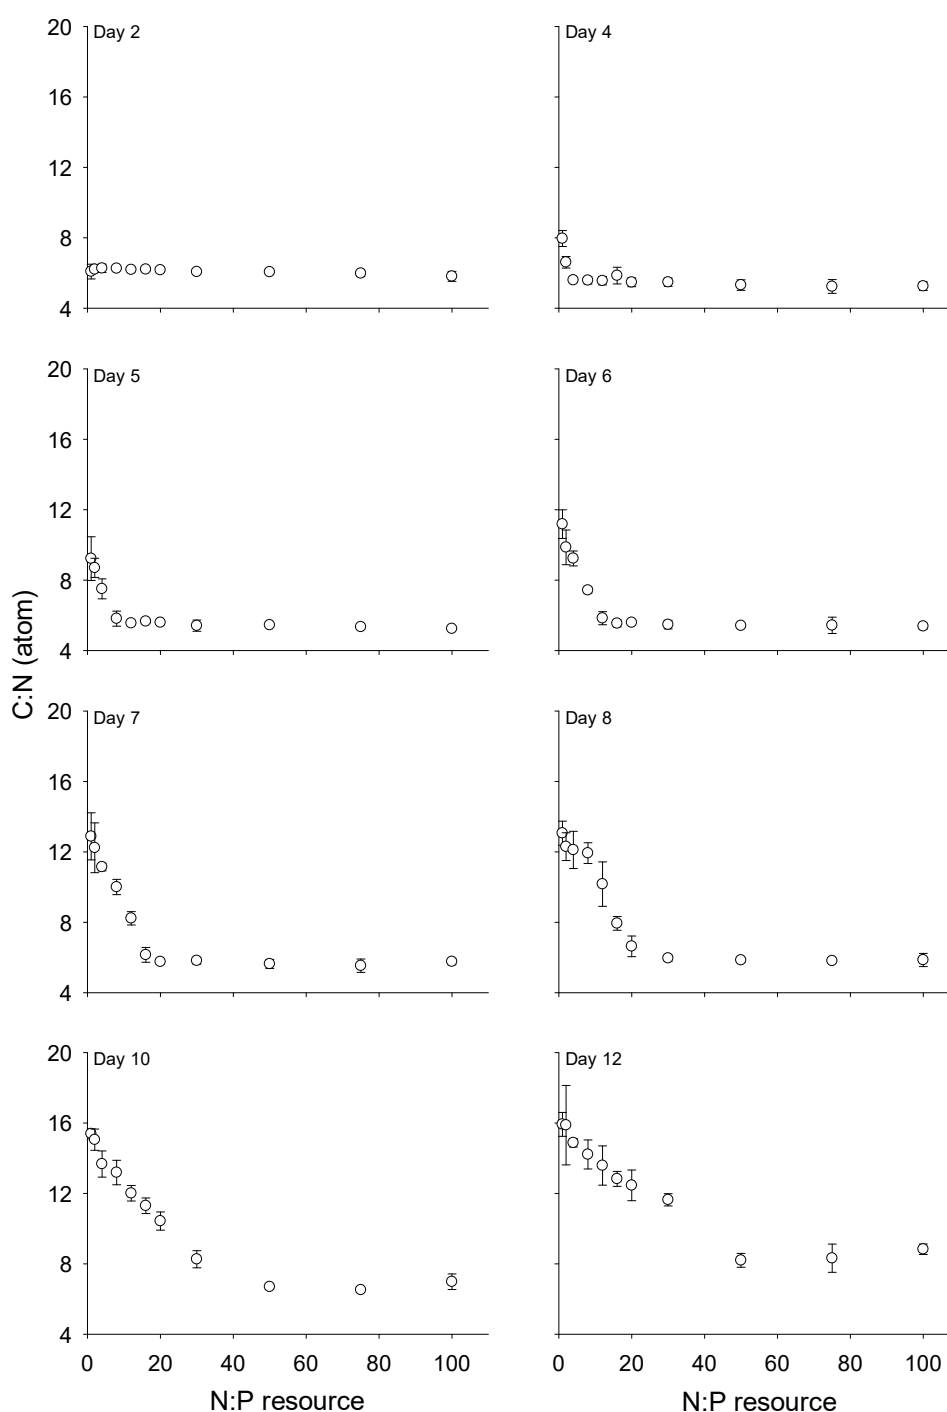

**Figure S1.** Temporal dynamics of carbon to nitrogen (C:N) by atom across a gradient of resource N: phosphorus (P) by atom generated by altering the resource N while maintaining constant P concentration.

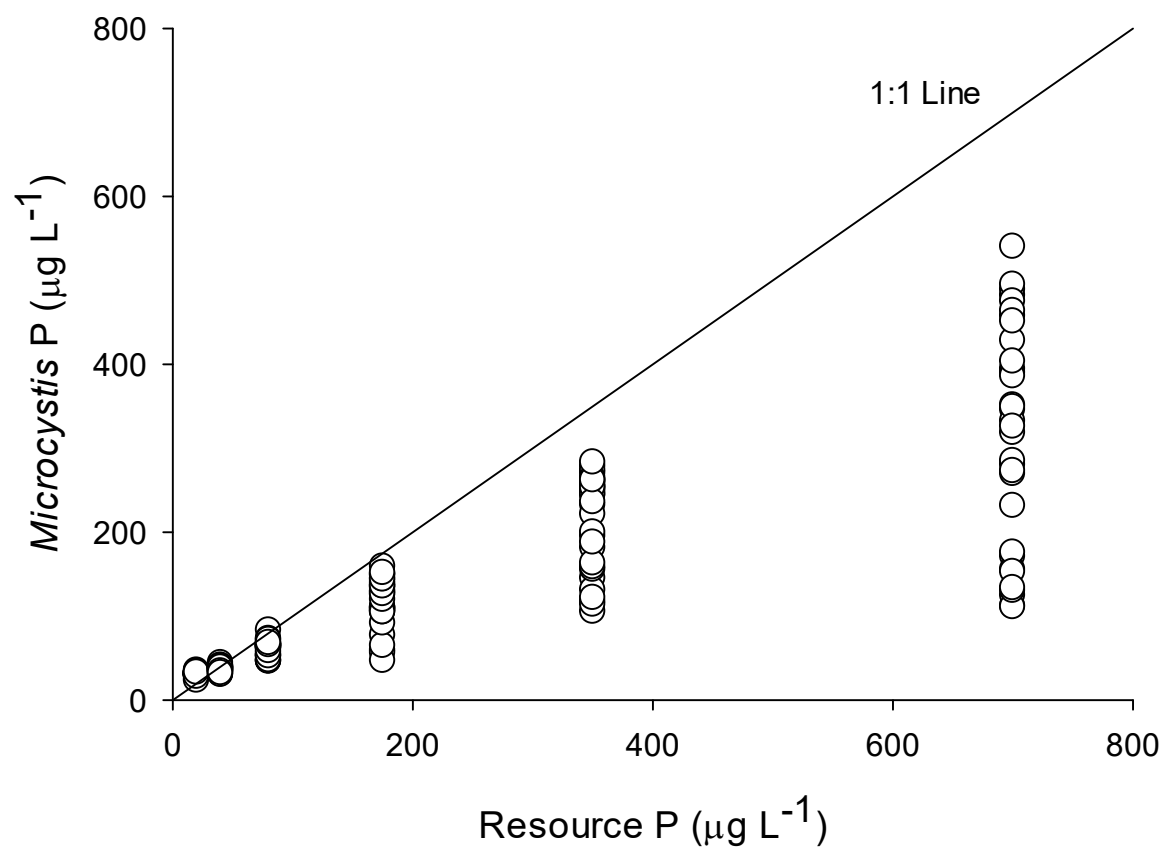

**Figure S2.** Amount of phosphorus (P) within the *Microcystis* blooms compared to P resource concentration for experiment 2.

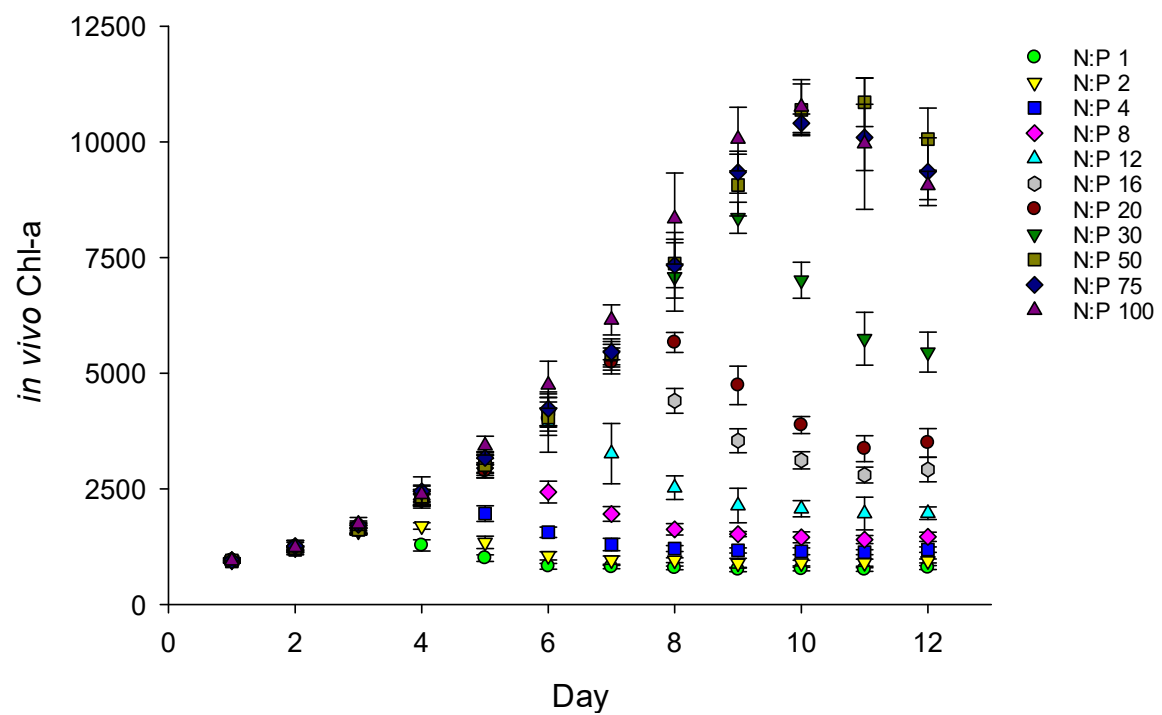

**Figure S3.** Temporal in vivo chlorophyll-a fluorescence for the growth and stoichiometry experiment.

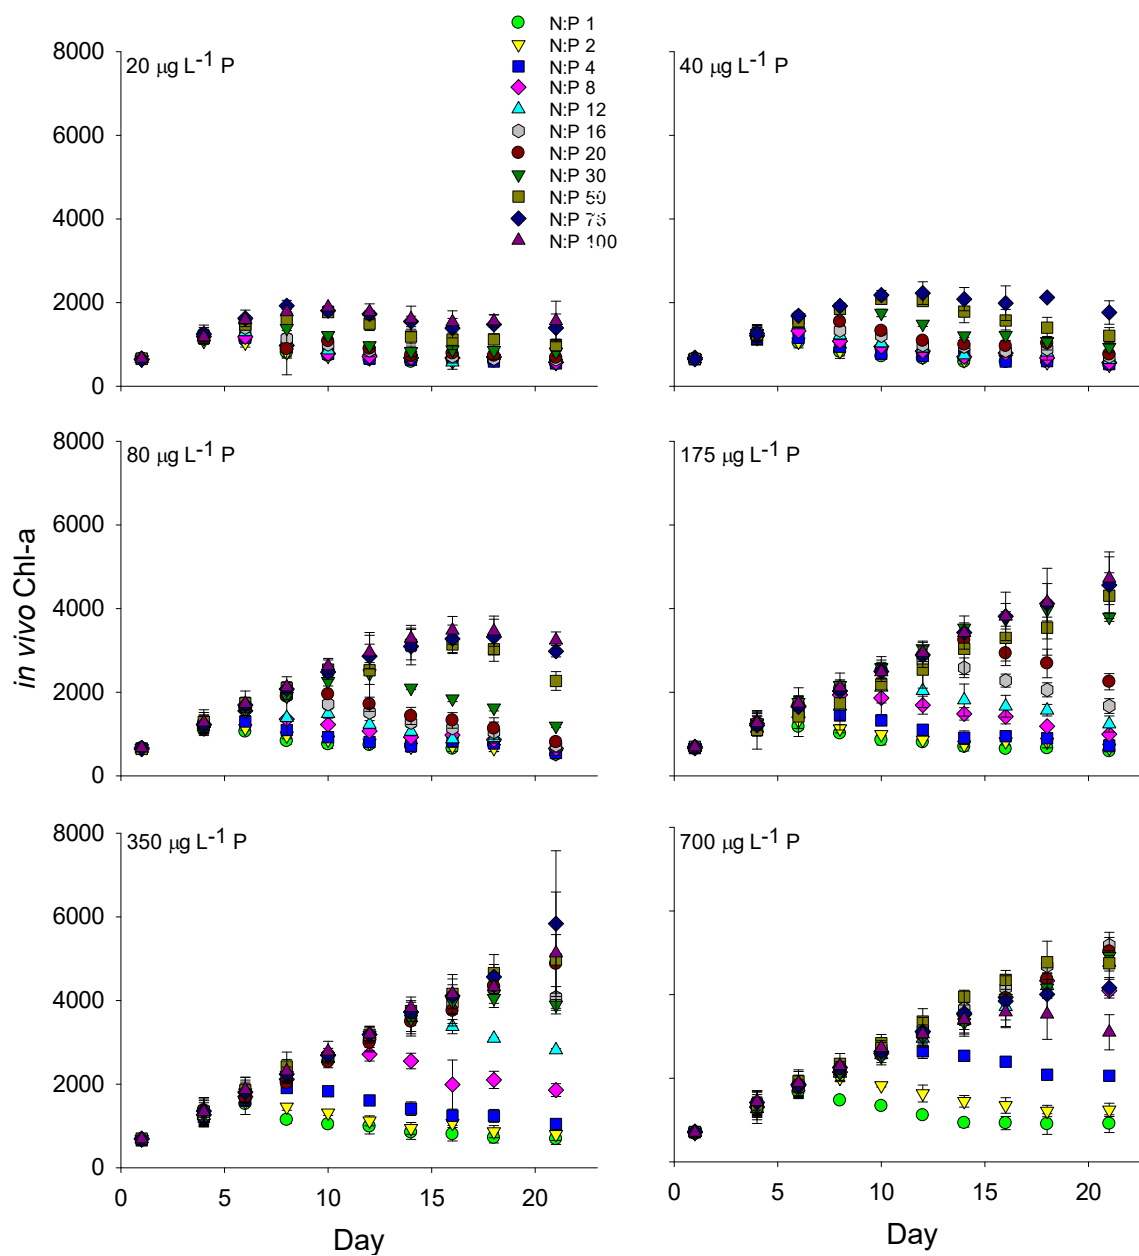

**Figure S4.** Temporal in vivo chlorophyll-a fluorescence for the phosphorus (P) and nitrogen (N) interaction experiment separated by P-concentration.

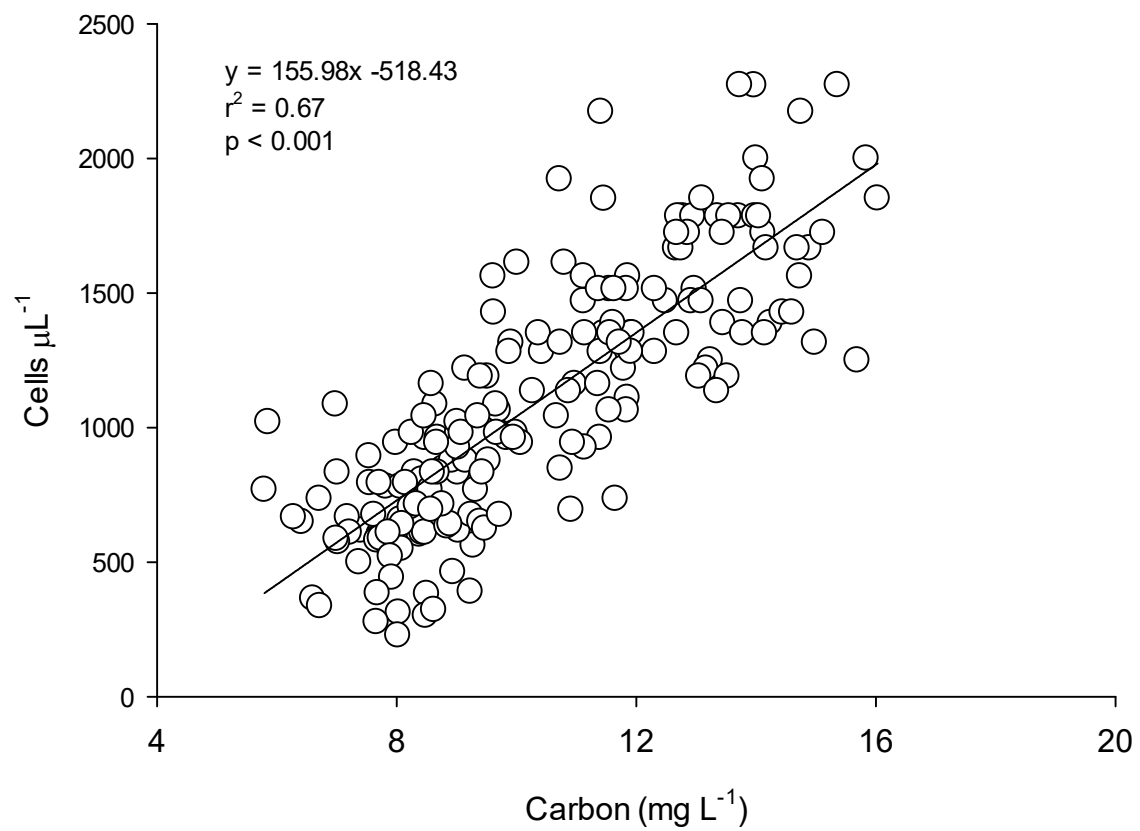

**Figure S5.** Relationship between biomass expressed as carbon (mg L<sup>-1</sup>) and cell counts (cells μL<sup>-1</sup>).

**Table S1.** Repeated measures 2-way ANOVA with Tukey's posthoc test between N:P treatments within a day and between days within a N:P treatment.

| Variable  |  | Df |  | F value |  | p value |  |
|-----------|--|----|--|---------|--|---------|--|
| N:P       |  | 10 |  | 441.2   |  | <0.001  |  |
| Day       |  | 7  |  | 794.49  |  | <0.001  |  |
| N.P × Day |  | 70 |  | 23.81   |  | <0.001  |  |

| Post hoc Comparisons |   |     |   |   |    |   |    |    |  |  |  |
|----------------------|---|-----|---|---|----|---|----|----|--|--|--|
|                      |   | Day |   |   |    |   |    |    |  |  |  |
| Treatment (N:P)      | 2 | 4   | 5 | 6 | 7  | 8 | 10 | 12 |  |  |  |
| 1                    | A | A   | A | A | A  | A | A  | A  |  |  |  |
| 2                    | A | B   | A | B | AB | A | A  | A  |  |  |  |
| 4                    | A | C   | B | B | BC | A | B  | A  |  |  |  |
| 8                    | A | C   | C | C | C  | A | BC | AB |  |  |  |
| 12                   | A | C   | D | D | D  | B | CD | BC |  |  |  |
| 16                   | A | C   | D | D | E  | C | DE | BC |  |  |  |
| 20                   | A | C   | D | D | E  | C | E  | BC |  |  |  |
| 30                   | A | C   | D | D | E  | D | F  | C  |  |  |  |
| 50                   | A | C   | D | D | E  | D | G  | D  |  |  |  |
| 75                   | A | C   | D | D | E  | D | G  | D  |  |  |  |
| 100                  | A | C   | D | D | E  | D | G  | D  |  |  |  |

| Post hoc Comparisons |    |               |   |   |    |    |      |    |     |    |     |
|----------------------|----|---------------|---|---|----|----|------|----|-----|----|-----|
|                      |    | N:P treatment |   |   |    |    |      |    |     |    |     |
| Day                  | 1  | 2             | 4 | 8 | 12 | 16 | 20   | 30 | 50  | 75 | 100 |
| 2                    | A  | A             | A | A | A  | A  | ABCD | A  | AC  | AB | A   |
| 4                    | AB | A             | A | A | AB | A  | BD   | A  | B   | A  | A   |
| 5                    | B  | AB            | B | A | AB | A  | ABC  | A  | BC  | A  | A   |
| 6                    | C  | B             | C | B | B  | A  | ABD  | A  | BC  | AB | A   |
| 7                    | C  | B             | D | C | C  | A  | ABCD | A  | ABC | AB | A   |
| 8                    | C  | B             | D | D | D  | B  | ABCD | A  | AC  | AB | A   |
| 10                   | D  | C             | E | E | E  | C  | E    | B  | D   | B  | B   |
| 12                   | D  | C             | E | E | F  | D  | F    | C  | E   | C  | C   |

**Table S2.** Different nitrogen as nitrate (N-NO<sub>3</sub>) and phosphorus as phosphate (P-PO<sub>4</sub>) concentration in all simulated blooms.

| Tradeoff with 1 P concentration                             |                           |                         |                           |                         |
|-------------------------------------------------------------|---------------------------|-------------------------|---------------------------|-------------------------|
| N:P (mol)                                                   | PO <sub>4</sub> -P (mg/L) | PO <sub>4</sub> -P (mM) | NO <sub>3</sub> -N (mg/L) | NO <sub>3</sub> -N (mM) |
| 1                                                           | 0.357                     | 0.012                   | 0.16                      | 0.012                   |
| 2                                                           | 0.357                     | 0.012                   | 0.32                      | 0.023                   |
| 4                                                           | 0.357                     | 0.012                   | 0.64                      | 0.046                   |
| 8                                                           | 0.357                     | 0.012                   | 1.29                      | 0.092                   |
| 12                                                          | 0.357                     | 0.012                   | 1.93                      | 0.138                   |
| 16                                                          | 0.357                     | 0.012                   | 2.58                      | 0.184                   |
| 20                                                          | 0.357                     | 0.012                   | 3.22                      | 0.230                   |
| 30                                                          | 0.357                     | 0.012                   | 4.84                      | 0.345                   |
| 50                                                          | 0.357                     | 0.012                   | 8.06                      | 0.576                   |
| 75                                                          | 0.357                     | 0.012                   | 12.09                     | 0.864                   |
| 100                                                         | 0.357                     | 0.012                   | 16.12                     | 1.152                   |
| Tradeoffs with interacting different N and P concentrations |                           |                         |                           |                         |
| N:P (mol)                                                   | PO <sub>4</sub> -P (mg/L) | PO <sub>4</sub> -P (mM) | NO <sub>3</sub> -N (mg/L) | NO <sub>3</sub> -N (mM) |
| 1                                                           | 0.02                      | $6.4 \times 10^{-4}$    | 0.009                     | $6.4 \times 10^{-4}$    |
| 2                                                           | 0.02                      | $6.4 \times 10^{-4}$    | 0.018                     | $1.2 \times 10^{-3}$    |
| 4                                                           | 0.02                      | $6.4 \times 10^{-4}$    | 0.036                     | $2.6 \times 10^{-3}$    |
| 8                                                           | 0.02                      | $6.4 \times 10^{-4}$    | 0.072                     | $5.1 \times 10^{-3}$    |
| 12                                                          | 0.02                      | $6.4 \times 10^{-4}$    | 0.108                     | $7.7 \times 10^{-3}$    |
| 16                                                          | 0.02                      | $6.4 \times 10^{-4}$    | 0.145                     | $1.0 \times 10^{-2}$    |
| 20                                                          | 0.02                      | $6.4 \times 10^{-4}$    | 0.181                     | $1.3 \times 10^{-2}$    |
| 30                                                          | 0.02                      | $6.4 \times 10^{-4}$    | 0.271                     | $1.9 \times 10^{-2}$    |
| 50                                                          | 0.02                      | $6.4 \times 10^{-4}$    | 0.452                     | $3.2 \times 10^{-2}$    |
| 75                                                          | 0.02                      | $6.4 \times 10^{-4}$    | 0.677                     | $4.8 \times 10^{-2}$    |
| 100                                                         | 0.02                      | $6.4 \times 10^{-4}$    | 0.903                     | $6.5 \times 10^{-2}$    |
| 1                                                           | 0.04                      | $1.3 \times 10^{-3}$    | 0.018                     | $1.2 \times 10^{-3}$    |
| 2                                                           | 0.04                      | $1.3 \times 10^{-3}$    | 0.036                     | $2.6 \times 10^{-3}$    |
| 4                                                           | 0.04                      | $1.3 \times 10^{-3}$    | 0.072                     | $5.1 \times 10^{-3}$    |
| 8                                                           | 0.04                      | $1.3 \times 10^{-3}$    | 0.145                     | $1.0 \times 10^{-2}$    |
| 12                                                          | 0.04                      | $1.3 \times 10^{-3}$    | 0.217                     | $1.5 \times 10^{-2}$    |
| 16                                                          | 0.04                      | $1.3 \times 10^{-3}$    | 0.289                     | $2.1 \times 10^{-2}$    |
| 20                                                          | 0.04                      | $1.3 \times 10^{-3}$    | 0.361                     | $2.6 \times 10^{-2}$    |
| 30                                                          | 0.04                      | $1.3 \times 10^{-3}$    | 0.542                     | $3.9 \times 10^{-2}$    |
| 50                                                          | 0.04                      | $1.3 \times 10^{-3}$    | 0.903                     | $6.5 \times 10^{-2}$    |
| 75                                                          | 0.04                      | $1.3 \times 10^{-3}$    | 1.355                     | $9.7 \times 10^{-2}$    |
| 100                                                         | 0.04                      | $1.3 \times 10^{-3}$    | 1.806                     | 0.129                   |
| 1                                                           | 0.08                      | $2.6 \times 10^{-3}$    | 0.036                     | $2.6 \times 10^{-3}$    |
| 2                                                           | 0.08                      | $2.6 \times 10^{-3}$    | 0.072                     | $5.1 \times 10^{-3}$    |
| 4                                                           | 0.08                      | $2.6 \times 10^{-3}$    | 0.145                     | $1.0 \times 10^{-2}$    |
| 8                                                           | 0.08                      | $2.6 \times 10^{-3}$    | 0.289                     | $2.1 \times 10^{-2}$    |
| 12                                                          | 0.08                      | $2.6 \times 10^{-3}$    | 0.433                     | $3.1 \times 10^{-2}$    |
| 16                                                          | 0.08                      | $2.6 \times 10^{-3}$    | 0.578                     | $4.1 \times 10^{-2}$    |
| 20                                                          | 0.08                      | $2.6 \times 10^{-3}$    | 0.723                     | $5.2 \times 10^{-2}$    |
| 30                                                          | 0.08                      | $2.6 \times 10^{-3}$    | 1.083                     | $7.7 \times 10^{-2}$    |
| 50                                                          | 0.08                      | $2.6 \times 10^{-3}$    | 1.806                     | 0.129                   |
| 75                                                          | 0.08                      | $2.6 \times 10^{-3}$    | 2.109                     | 0.151                   |
| 100                                                         | 0.08                      | $2.6 \times 10^{-3}$    | 3.612                     | 0.158                   |
| 1                                                           | 0.175                     | $5.6 \times 10^{-3}$    | 0.079                     | $5.6 \times 10^{-3}$    |

|     |       |                      |        |                      |
|-----|-------|----------------------|--------|----------------------|
| 2   | 0.175 | $5.6 \times 10^{-3}$ | 0.158  | $1.1 \times 10^{-2}$ |
| 4   | 0.175 | $5.6 \times 10^{-3}$ | 0.316  | $2.3 \times 10^{-2}$ |
| 8   | 0.175 | $5.6 \times 10^{-3}$ | 0.632  | $4.5 \times 10^{-2}$ |
| 12  | 0.175 | $5.6 \times 10^{-3}$ | 0.948  | $6.8 \times 10^{-2}$ |
| 16  | 0.175 | $5.6 \times 10^{-3}$ | 1.264  | $9.0 \times 10^{-2}$ |
| 20  | 0.175 | $5.6 \times 10^{-3}$ | 1.580  | 0.113                |
| 30  | 0.175 | $5.6 \times 10^{-3}$ | 2.370  | 0.169                |
| 50  | 0.175 | $5.6 \times 10^{-3}$ | 3.951  | 0.282                |
| 75  | 0.175 | $5.6 \times 10^{-3}$ | 5.927  | 0.423                |
| 100 | 0.175 | $5.6 \times 10^{-3}$ | 7.903  | 0.565                |
| 1   | 0.350 | 0.011                | 0.158  | $1.1 \times 10^{-2}$ |
| 2   | 0.350 | 0.011                | 0.316  | $2.3 \times 10^{-2}$ |
| 4   | 0.350 | 0.011                | 0.632  | $4.5 \times 10^{-2}$ |
| 8   | 0.350 | 0.011                | 1.264  | $9.0 \times 10^{-2}$ |
| 12  | 0.350 | 0.011                | 1.896  | 0.135                |
| 16  | 0.350 | 0.011                | 2.529  | 0.181                |
| 20  | 0.350 | 0.011                | 3.161  | 0.226                |
| 30  | 0.350 | 0.011                | 4.741  | 0.339                |
| 50  | 0.350 | 0.011                | 7.903  | 0.565                |
| 75  | 0.350 | 0.011                | 11.854 | 0.867                |
| 100 | 0.350 | 0.011                | 15.806 | 1.129                |
| 1   | 0.700 | 0.023                | 0.316  | $2.3 \times 10^{-2}$ |
| 2   | 0.700 | 0.023                | 0.632  | $4.5 \times 10^{-2}$ |
| 4   | 0.700 | 0.023                | 1.264  | $9.0 \times 10^{-2}$ |
| 8   | 0.700 | 0.023                | 2.529  | 0.181                |
| 12  | 0.700 | 0.023                | 3.793  | 0.271                |
| 16  | 0.700 | 0.023                | 5.058  | 0.361                |
| 20  | 0.700 | 0.023                | 6.322  | 0.452                |
| 30  | 0.700 | 0.023                | 9.483  | 0.677                |
| 50  | 0.700 | 0.023                | 15.806 | 1.129                |
| 75  | 0.700 | 0.023                | 23.709 | 1.694                |
| 100 | 0.700 | 0.023                | 31.612 | 2.258                |
